# Supplementary material for: Metabolic responses to ethanol and butanol in Chlamydomonas reinhardtii
Source: PubMed Central journal article supplement (PMC5646117; doi:10.1186/s13068-017-0931-9), 2017-10-17

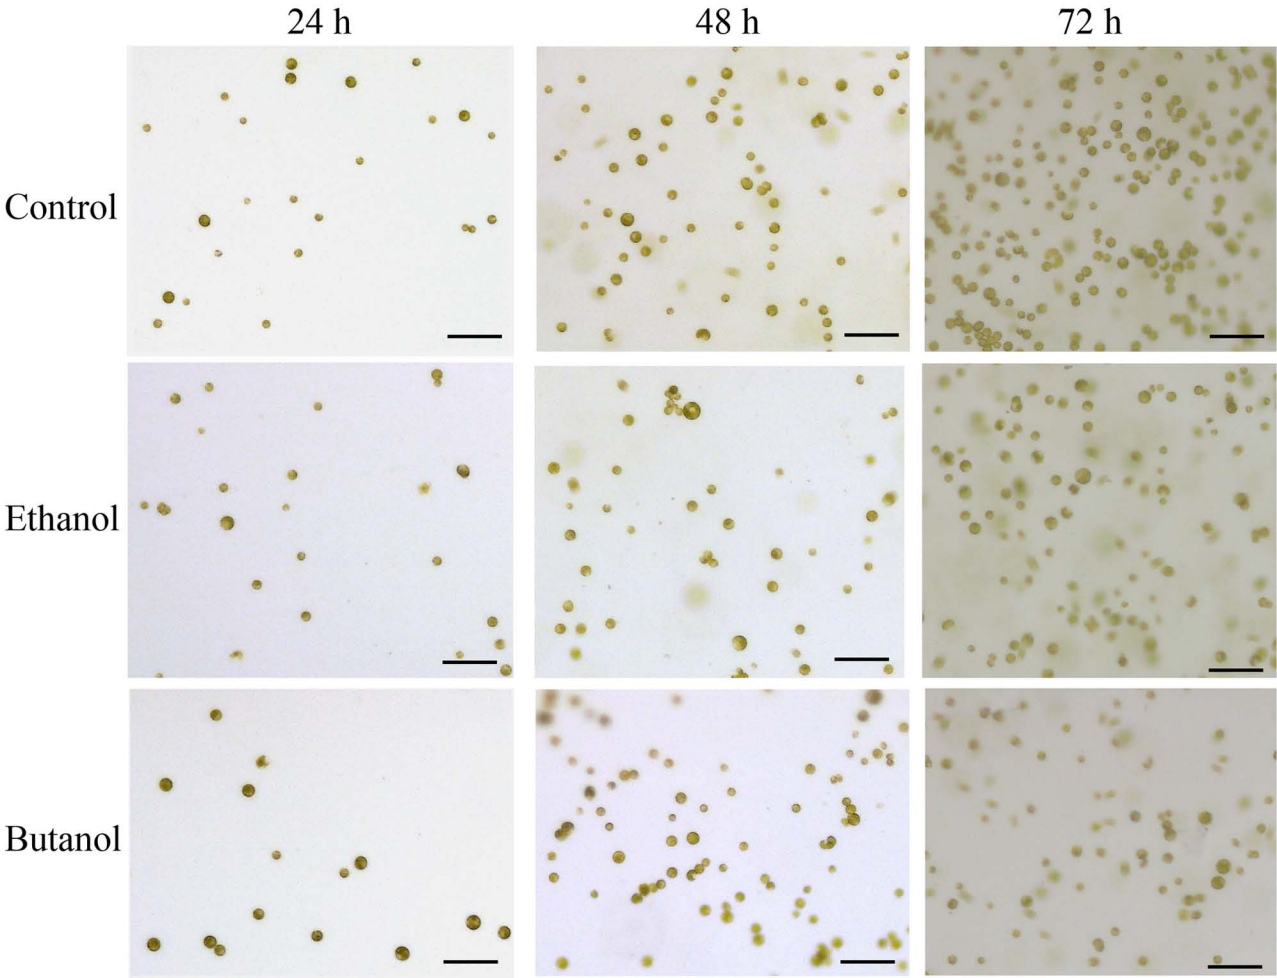

Supplement: 13068_2017_931_MOESM1_ESM.pdf [file 13068_2017_931_MOESM1_ESM.pdf]
